# Supplementary material for: Directing Stem Cell Commitment by Amorphous Calcium Phosphate Nanoparticles Incorporated in PLGA: Relevance of the Free Calcium Ion Concentration
Source: MDPI journal article supplement (doi:10.3390/ijms21072627), 2020-04-09
Supplement: s1 [file s1]

## Supporting Information

# Directing stem cell commitment by amorphous calcium phosphate nanoparticles incorporated in PLGA: Relevance of the free calcium ion concentration

Olivier Gröninger<sup>1</sup>, Samuel Hess<sup>2</sup>, Dirk Mohn<sup>1,2</sup>, Elia Schneider<sup>1</sup>, Wendelin Stark<sup>1</sup>, Sonja Märsmann<sup>3,4</sup>, Petra Wolint<sup>3</sup>, Maurizio Calcagni<sup>3</sup>, Paolo Cinelli<sup>4</sup> and Johanna Buschmann<sup>3,\*</sup>

<sup>1</sup>Institute for Chemical and Bioengineering, Department of Chemistry and Applied Biosciences, ETH Zurich, Zurich, 8093, Switzerland

<sup>2</sup>Clinic for Preventive Dentistry, Periodontology and Cariology, University of Zurich, Center of Dental Medicine, Zurich, 8032, Switzerland

<sup>3</sup>Division of Plastic and Hand Surgery, University Hospital Zurich, Zurich, 8091, Switzerland

<sup>4</sup>Division of Trauma Surgery, University Hospital Zurich, Zurich, 8091, Switzerland

\*Corresponding author: johanna.buschmann@usz.ch

Word count for abstract: 169

Word count for manuscript: 4117

Number of references: 50

Number of figures: 7

Number of tables: 0

Number of Supplementary online-only files, if any: 1

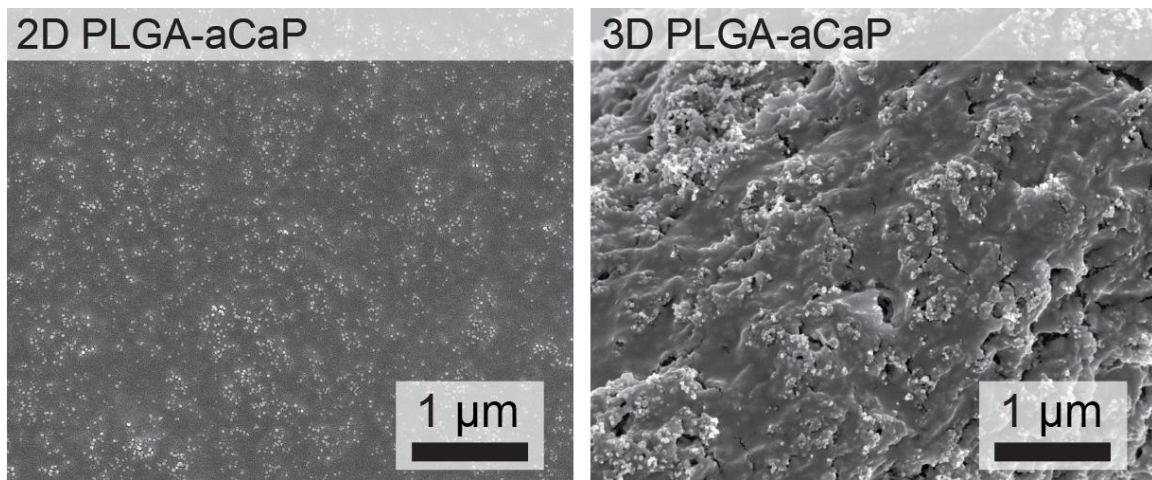

**Figure S1.** Increased magnification using SEM of 2D and 3D scaffolds to visualize aCaP nanoparticles. The surfaces of the scaffolds are shown.

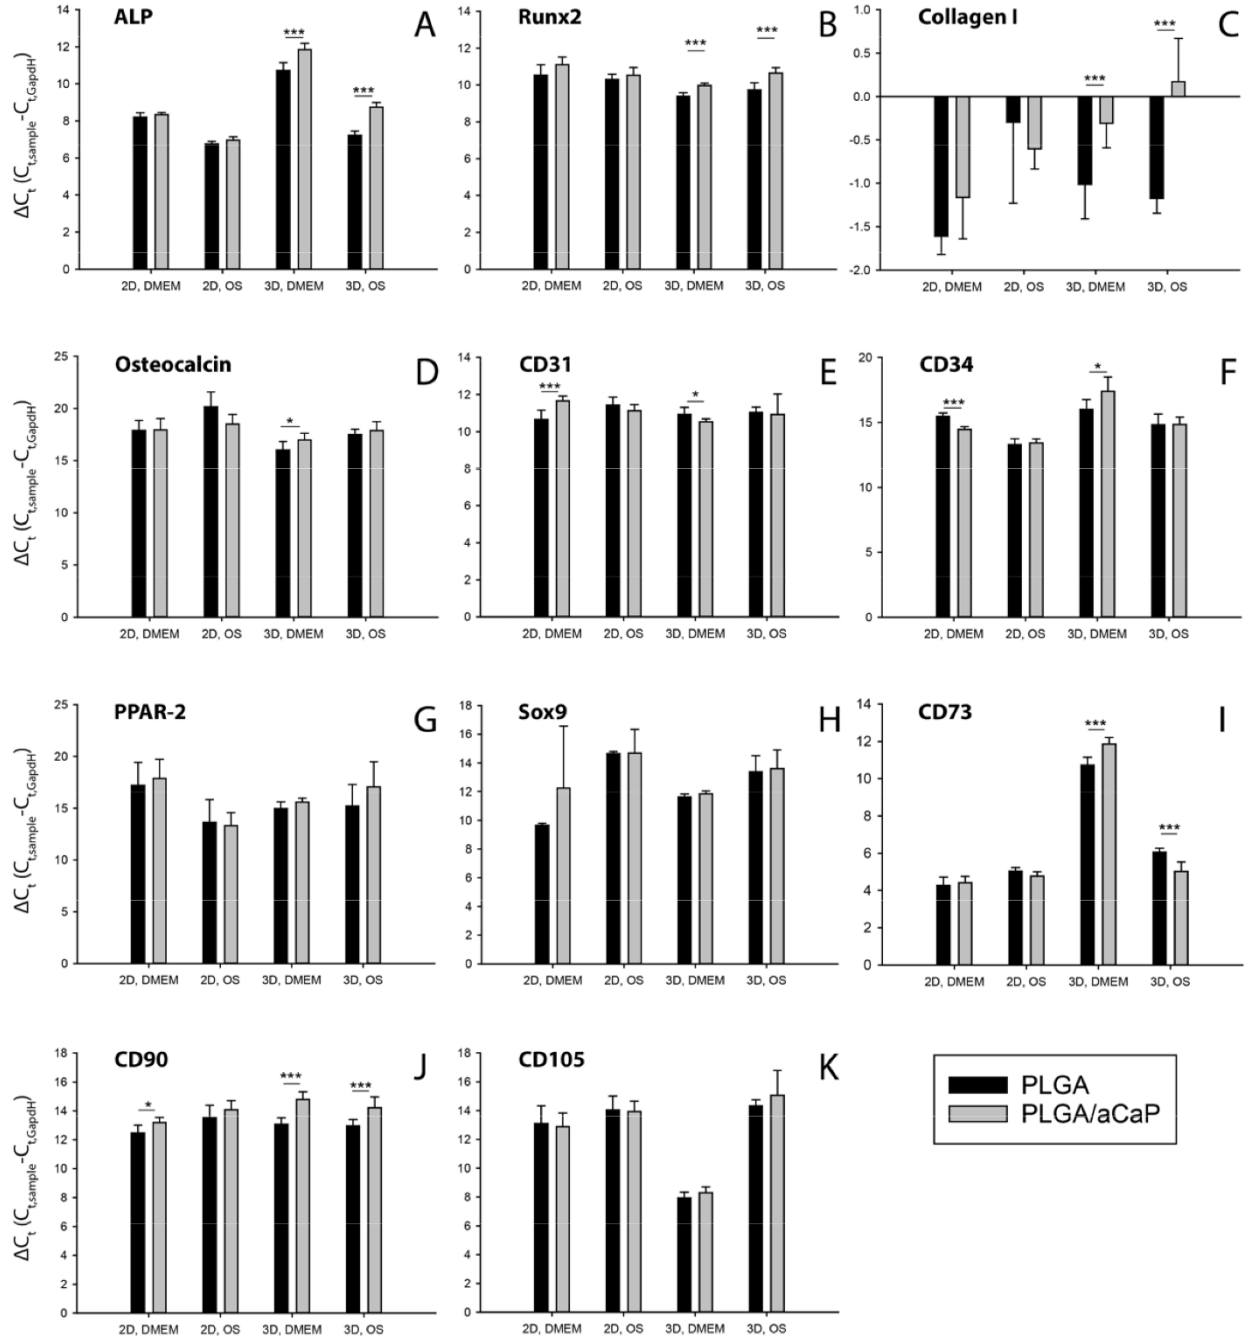

**Figure S2.** Gene expression of 11 genes (A-K) after a two-week incubation in either DMEM (basal culture medium) or OS (osteogenic medium) for casted films (2D) and electrospun random fiber meshes (3D). Delta Ct values indicate a downregulation if they are increased relatively to each other and vice versa. T-tests were performed to compare delta Ct values of PLGA and PLGA/aCaP for each condition. For comparison of the manifold inductions (PLGA/aCaP vs PLGA, expressed as  $2^{-\Delta\Delta C_t}$ ), we refer to **Figure 3** in the main manuscript.

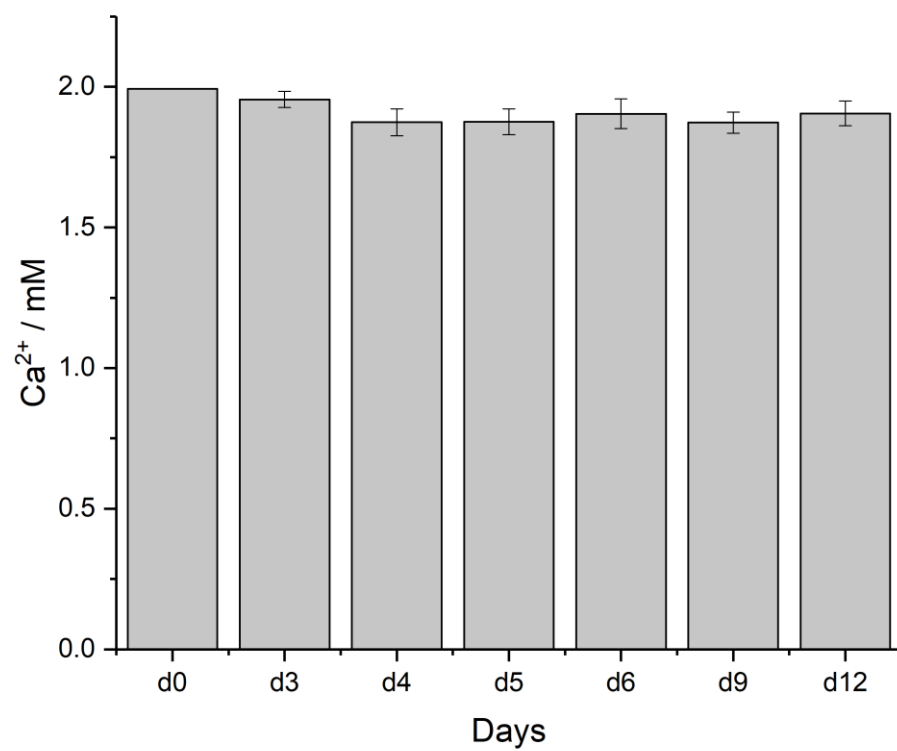

**Figure S3.** No significant depletion of calcium ions measured using excess (20 mL) DMEM.

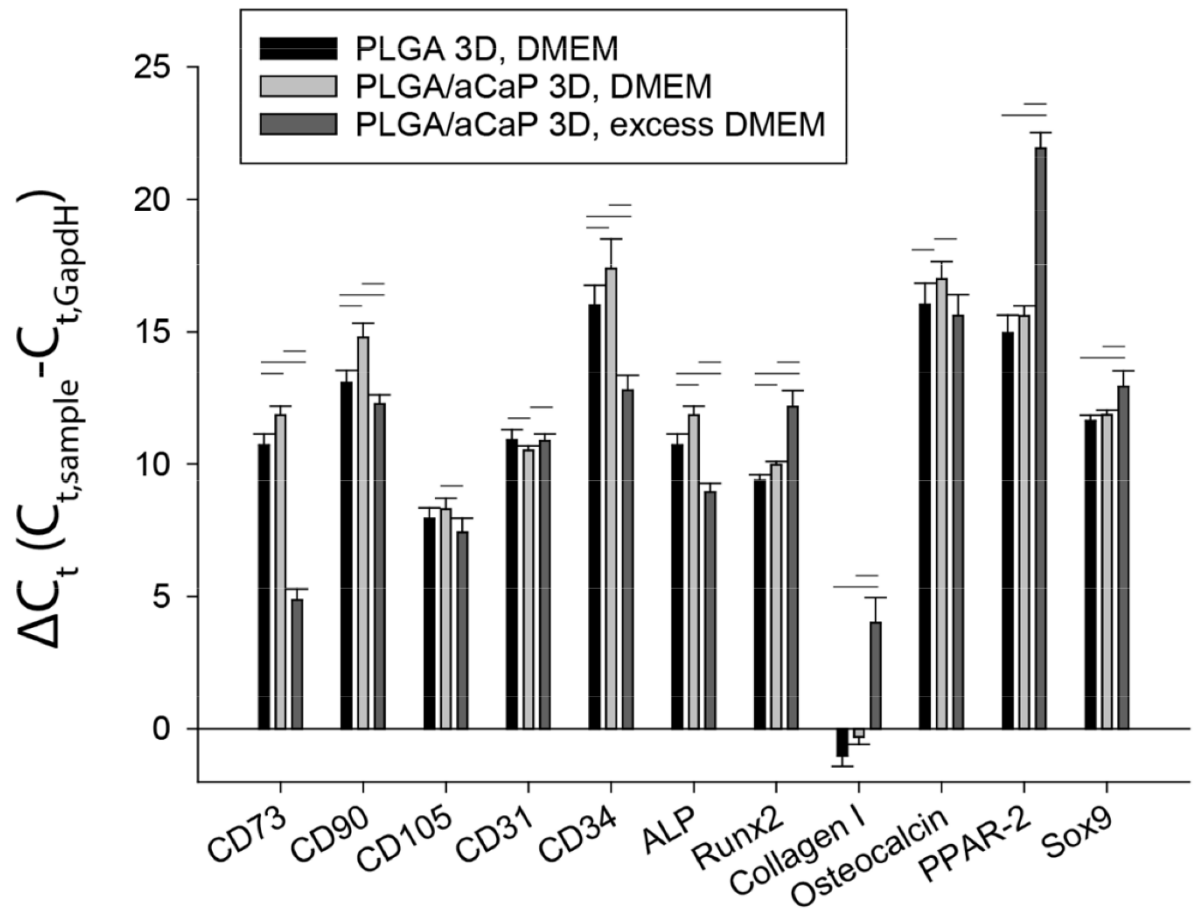

**Figure S4.** Gene expression for 3D electrospun meshes seeded with human ASCs under different culture conditions. Excess DMEM (10 times more than normal) was used to provide a constant Ca<sup>2+</sup> concentration. The lines indicate statistical significance with  $p < 0.05$ . For comparison of the manifold inductions (PLGA/aCaP vs PLGA, expressed as  $2^{-\Delta\Delta C_t}$ ), we refer to **Figure 3** in the main manuscript.

| Gene              |         | Sequence (5'-3')                 |
|-------------------|---------|----------------------------------|
| GAPDH             | forward | ACC ACA GTC CAT GCC ATC AC       |
|                   | reverse | TCC ACC ACC CTG TTG CTG TA       |
| CD31              | forward | ATT GCA GTG GTT ATC ATC GGA GTG  |
|                   | reverse | CTC GTT GTT GG AGT TCA GAA GTG G |
| CD34              | forward | TGA AGC CTA GCC TGT CAC CT       |
|                   | reverse | CGC ACA GCT GGA GGT CTT AT       |
| CD73              | forward | CTC CTC TCA ATC ATG CCG CT       |
|                   | reverse | CCC AGG TAA TTG TGC CAT TGT      |
| CD90              | forward | TGA ATA CAG ACT GCA CCT CCC      |
|                   | reverse | CTT GAC GGG TGA GGC TAG GA       |
| CD105             | forward | CAG CAG TGT CTT CCT GCA TC       |
|                   | reverse | AGT TCC ACC TTC ACC GTC AC       |
| ALP               | forward | CTG GTA GTT GTT GTG AGC AT       |
|                   | reverse | CCC AAA GGC TTC TTC TTG          |
| Osteocalcin       | forward | CAC TCC TCG CCC TAT TGG C        |
|                   | reverse | CCC TCC TGC TTG GAC ACA AAG      |
| Runx2             | forward | GAA CCC AGA AGG CAC AGA CA       |
|                   | reverse | GGC TCA GGT AGG AGG GCT          |
| COL1              | forward | TGA CGA GAC CAA GAA CTG          |
|                   | reverse | CCA TCC AAA CCA CTG AAA CC       |
| PPAR- $\alpha$ -2 | forward | AGG AGC AGA GCA AAG AGG          |
|                   | reverse | CCT CGG ATA TGA GAA CCC          |
| Sox 9             | forward | CTC TGG AGA CTT CTG AAC GAG AGC  |
|                   | reverse | GTT CTT CAC CGA CTT CCT CCG      |

**Table S1.** The sequences of forward and reverse primers.
